# Supplementary material for: A CRISPR/Cas-Mediated Selection-free Knockin Strategy in Human Embryonic Stem Cells
Source: PubMed Central journal article supplement — Stem Cell Reports. 2015 May 28;4(6):1103–11. doi: 10.1016/j.stemcr.2015.04.016 (PMC4471821; doi:10.1016/j.stemcr.2015.04.016), 2015-05-28
Supplement: mmc1.pdf [file mmc1.pdf]

**Stem Cell Reports, Volume 4**

**Supplemental Information**

**A CRISPR/Cas-Mediated Selection-free**

**Knockin Strategy in Human Embryonic Stem Cells**

**Zengrong Zhu, Nipun Verma, Federico González, Zhong-Dong Shi, and Danwei Huangfu**

# Figure S1

**A**

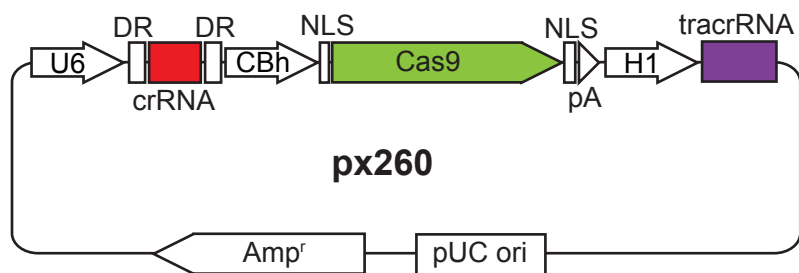

**B**

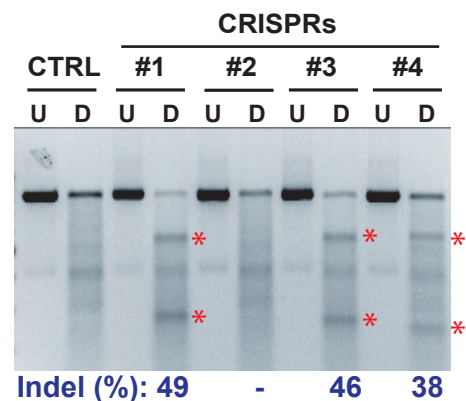

**C**

## PCR Genotyping

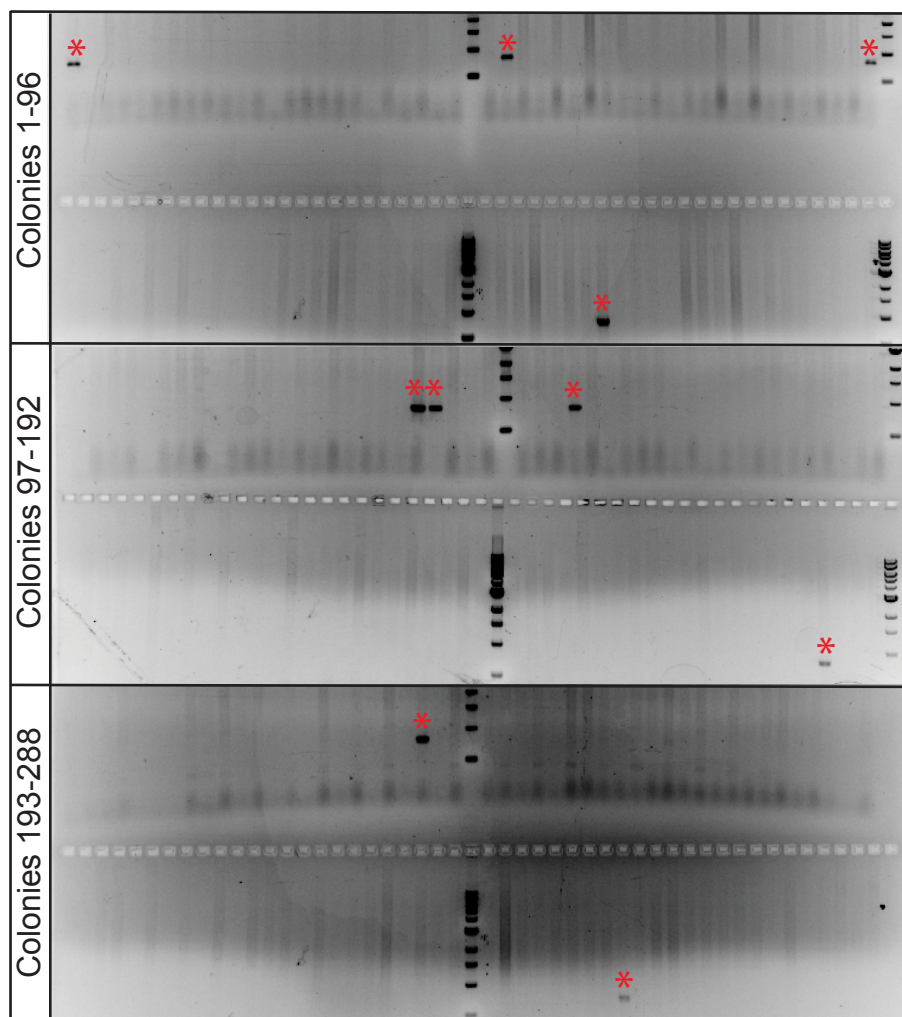

**D**

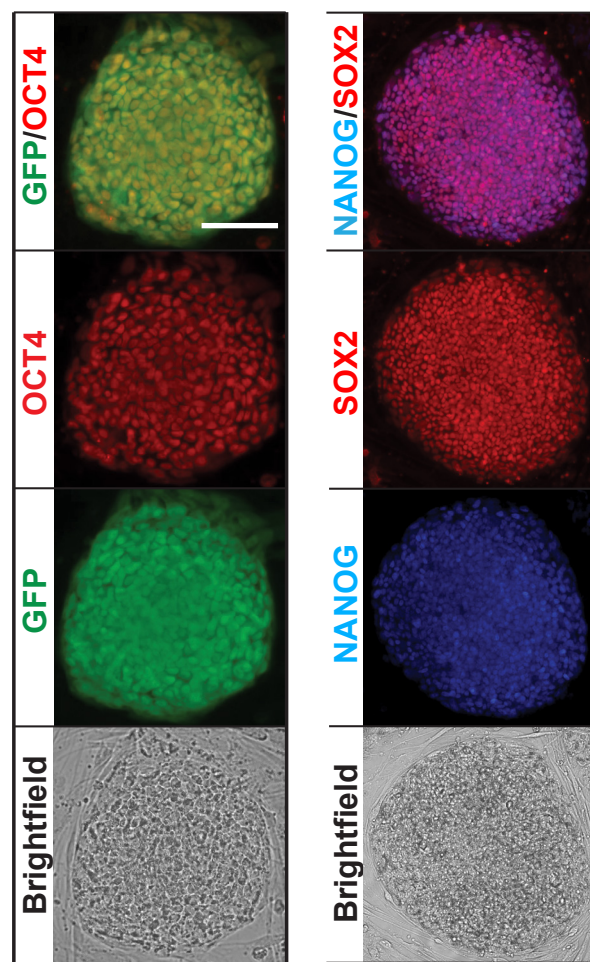

# Figure S2

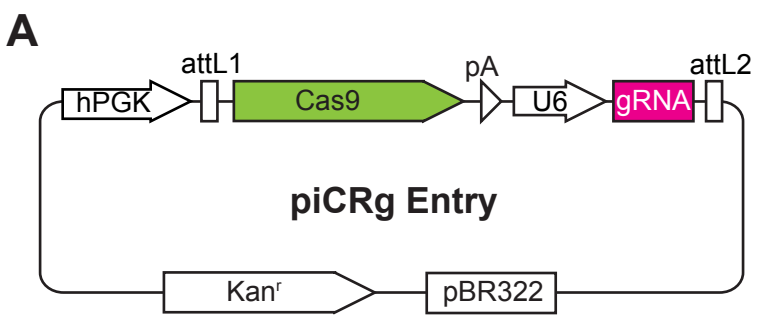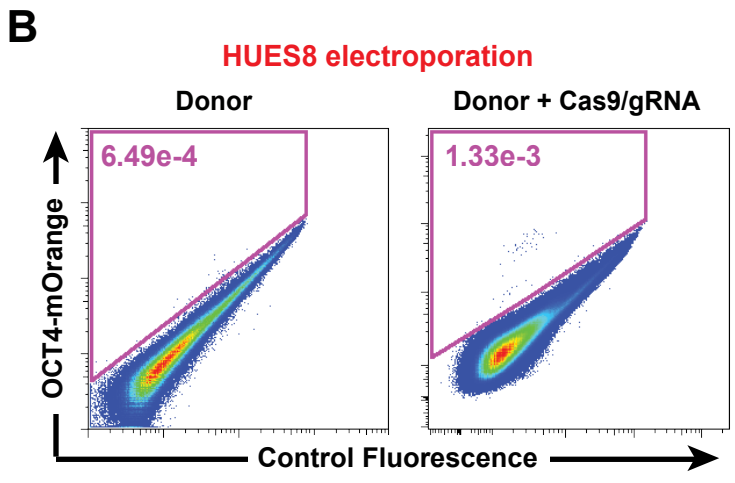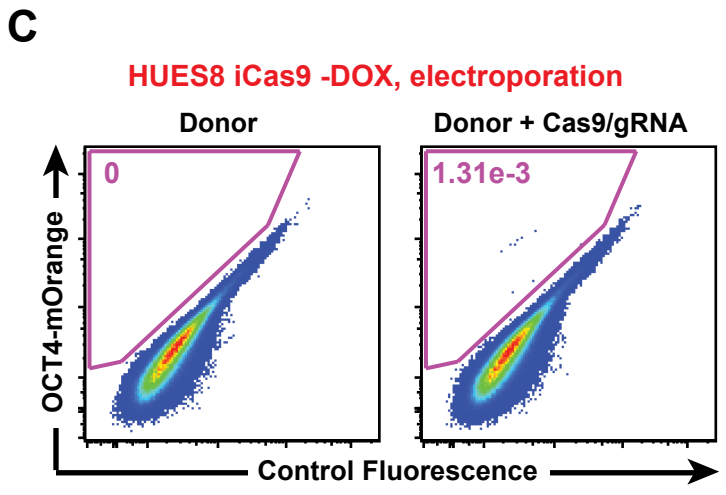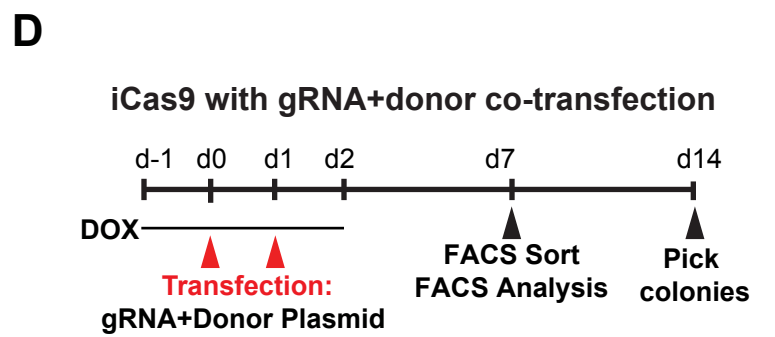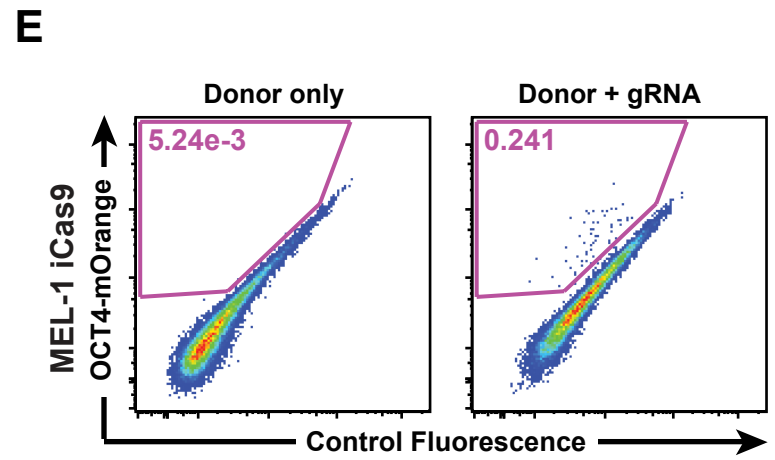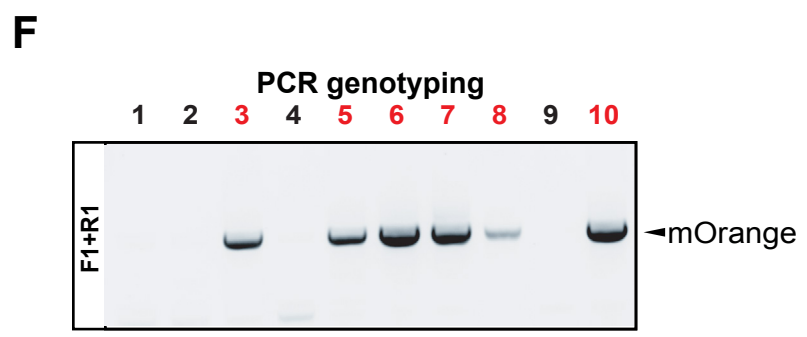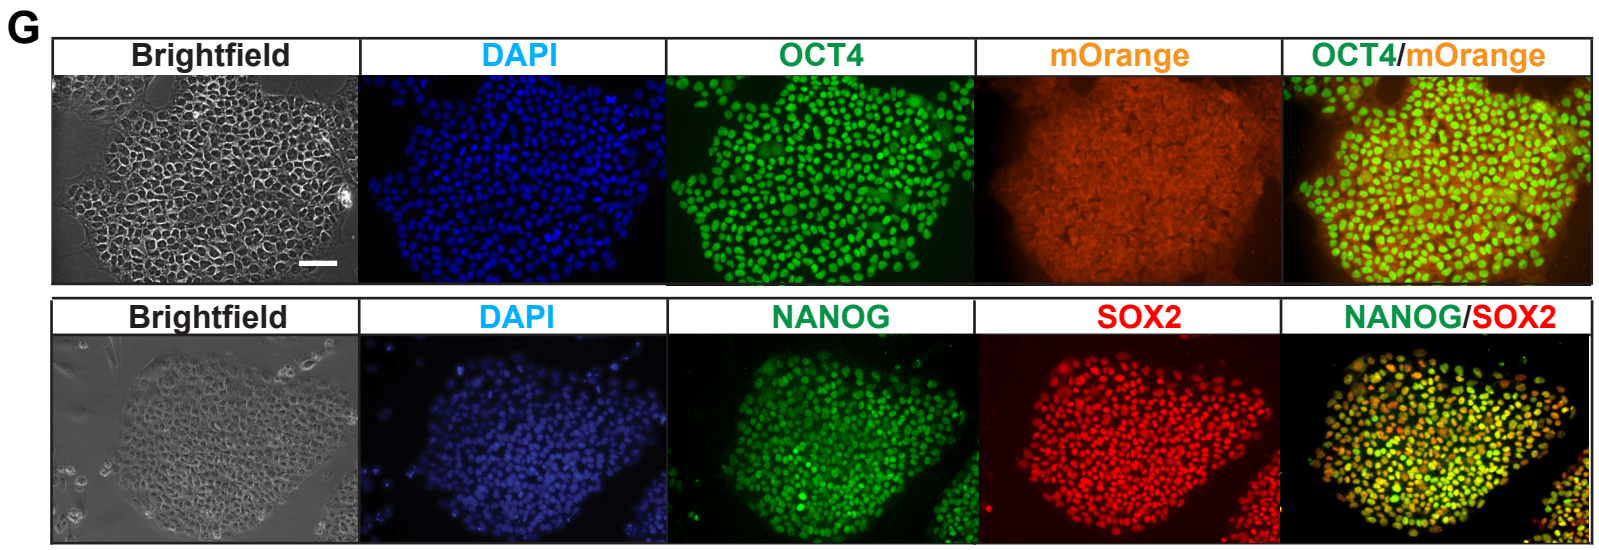



# Figure S3

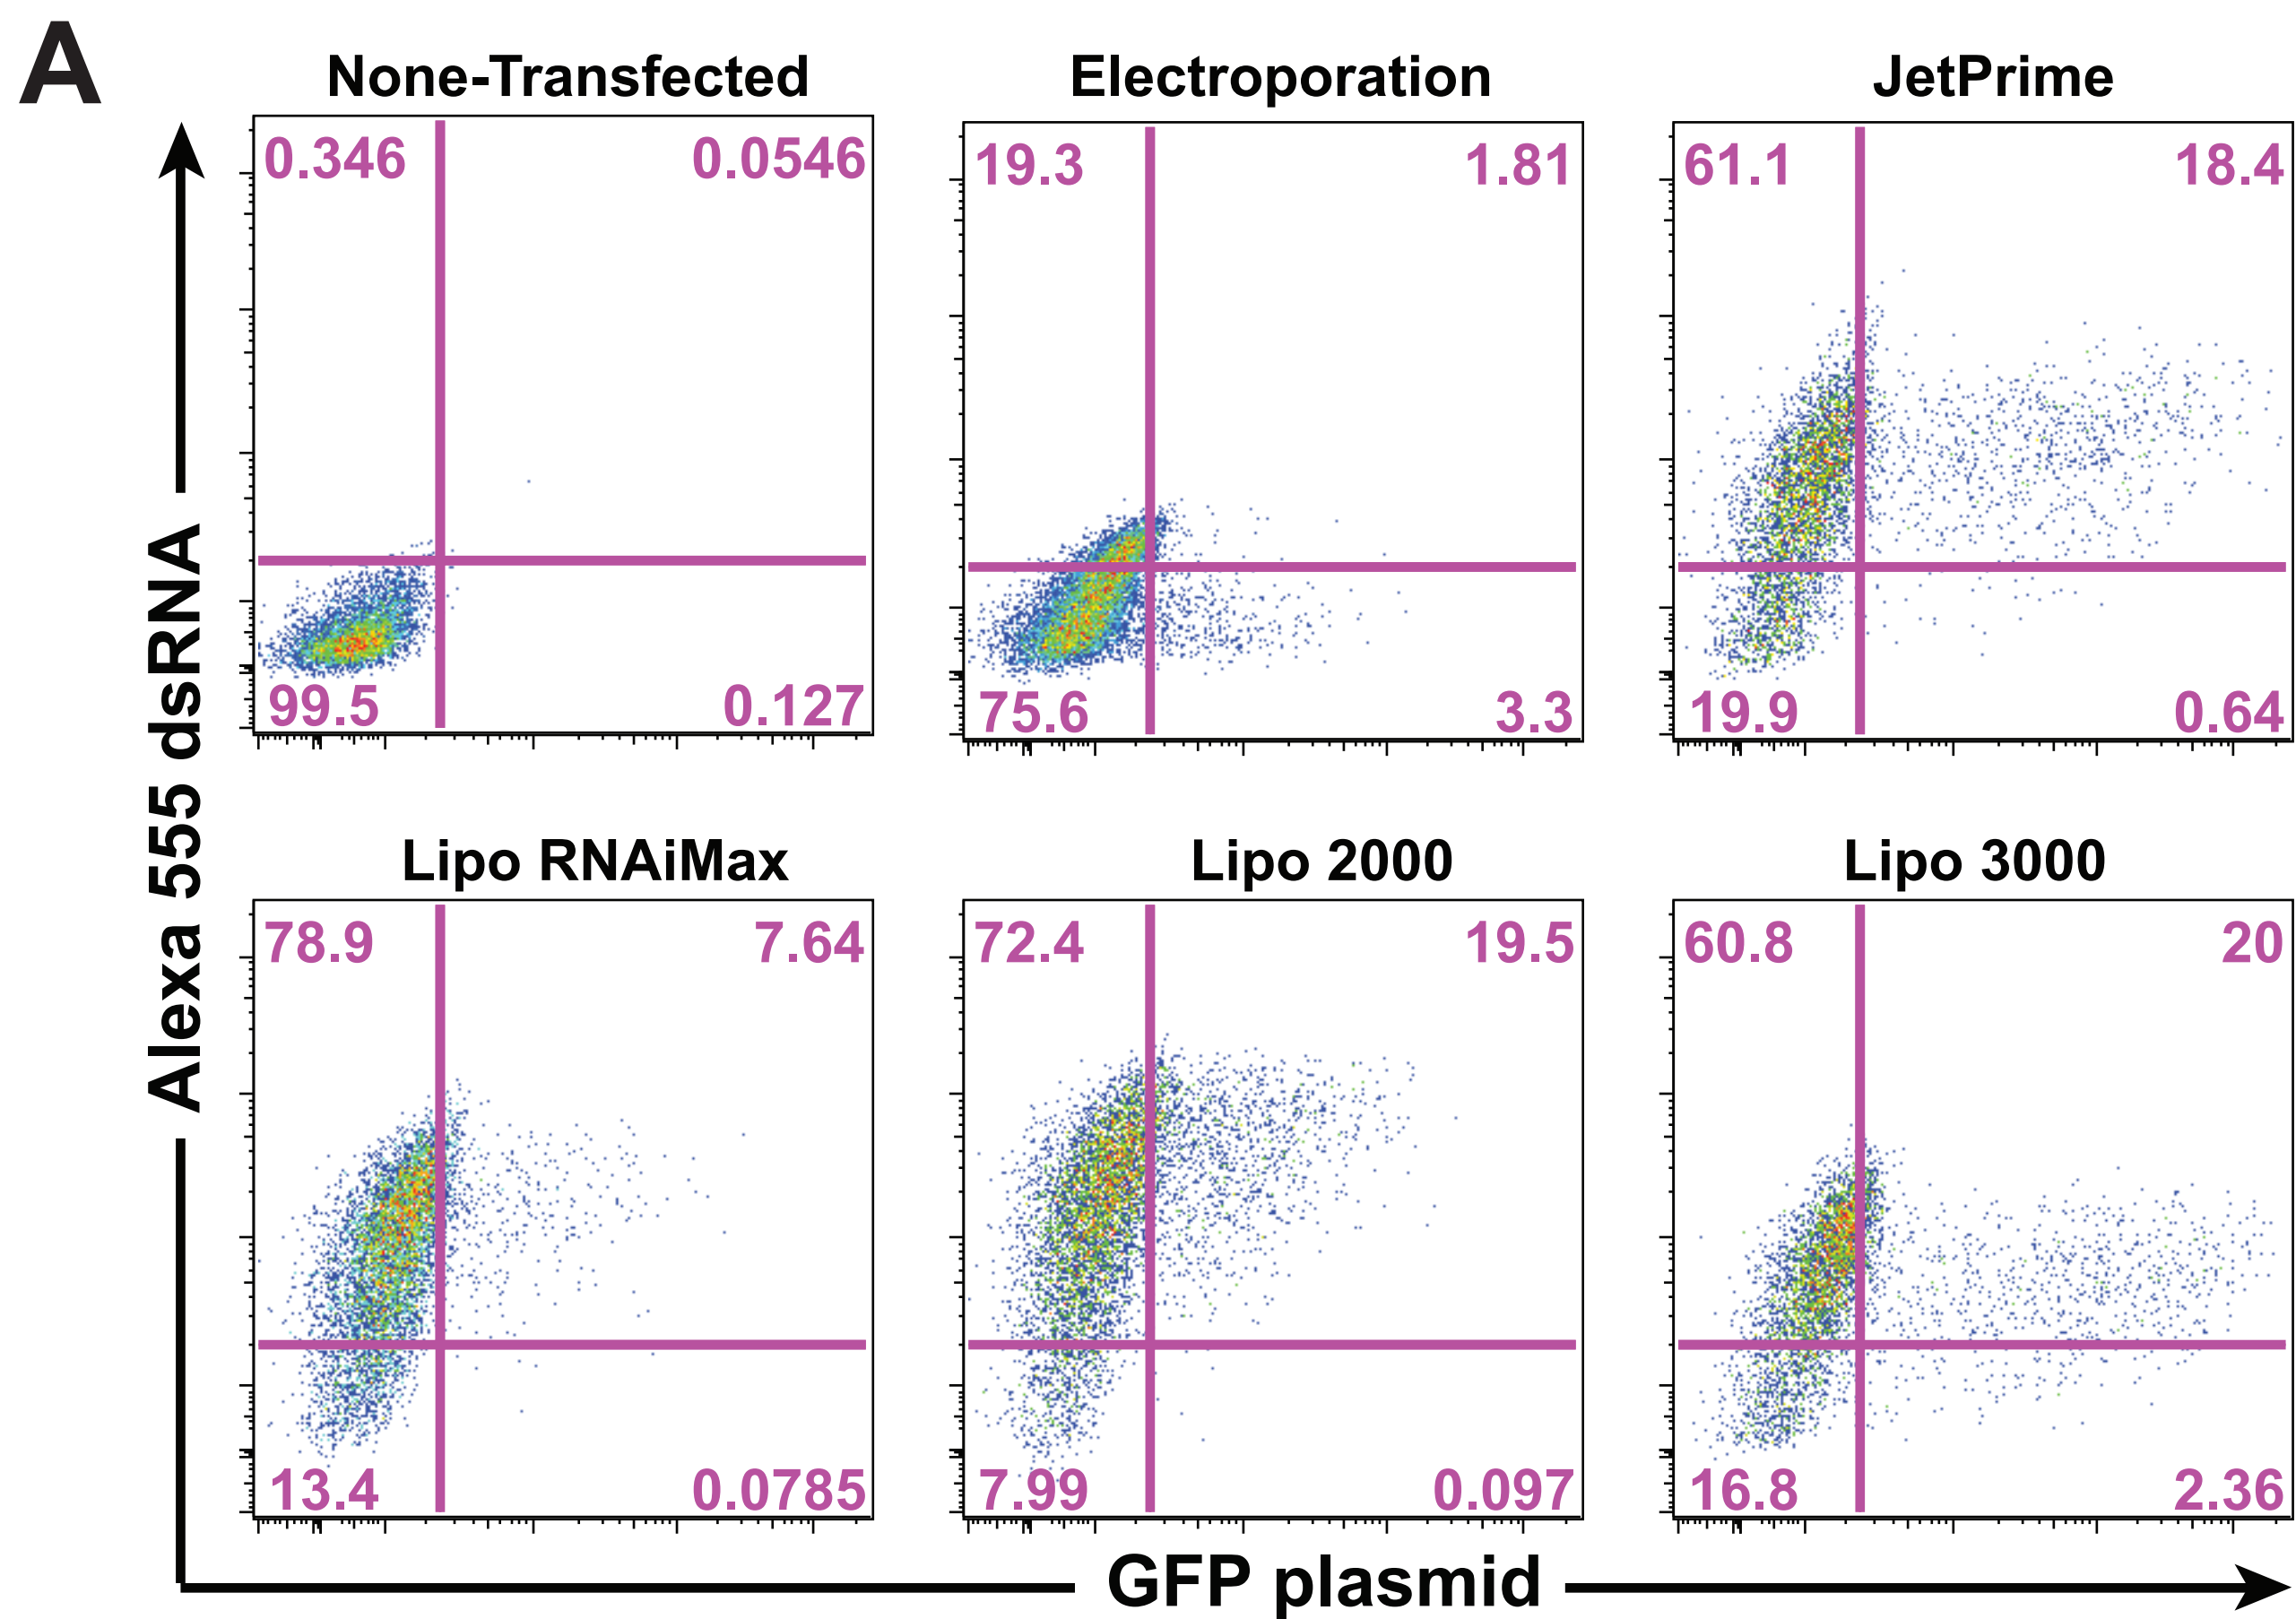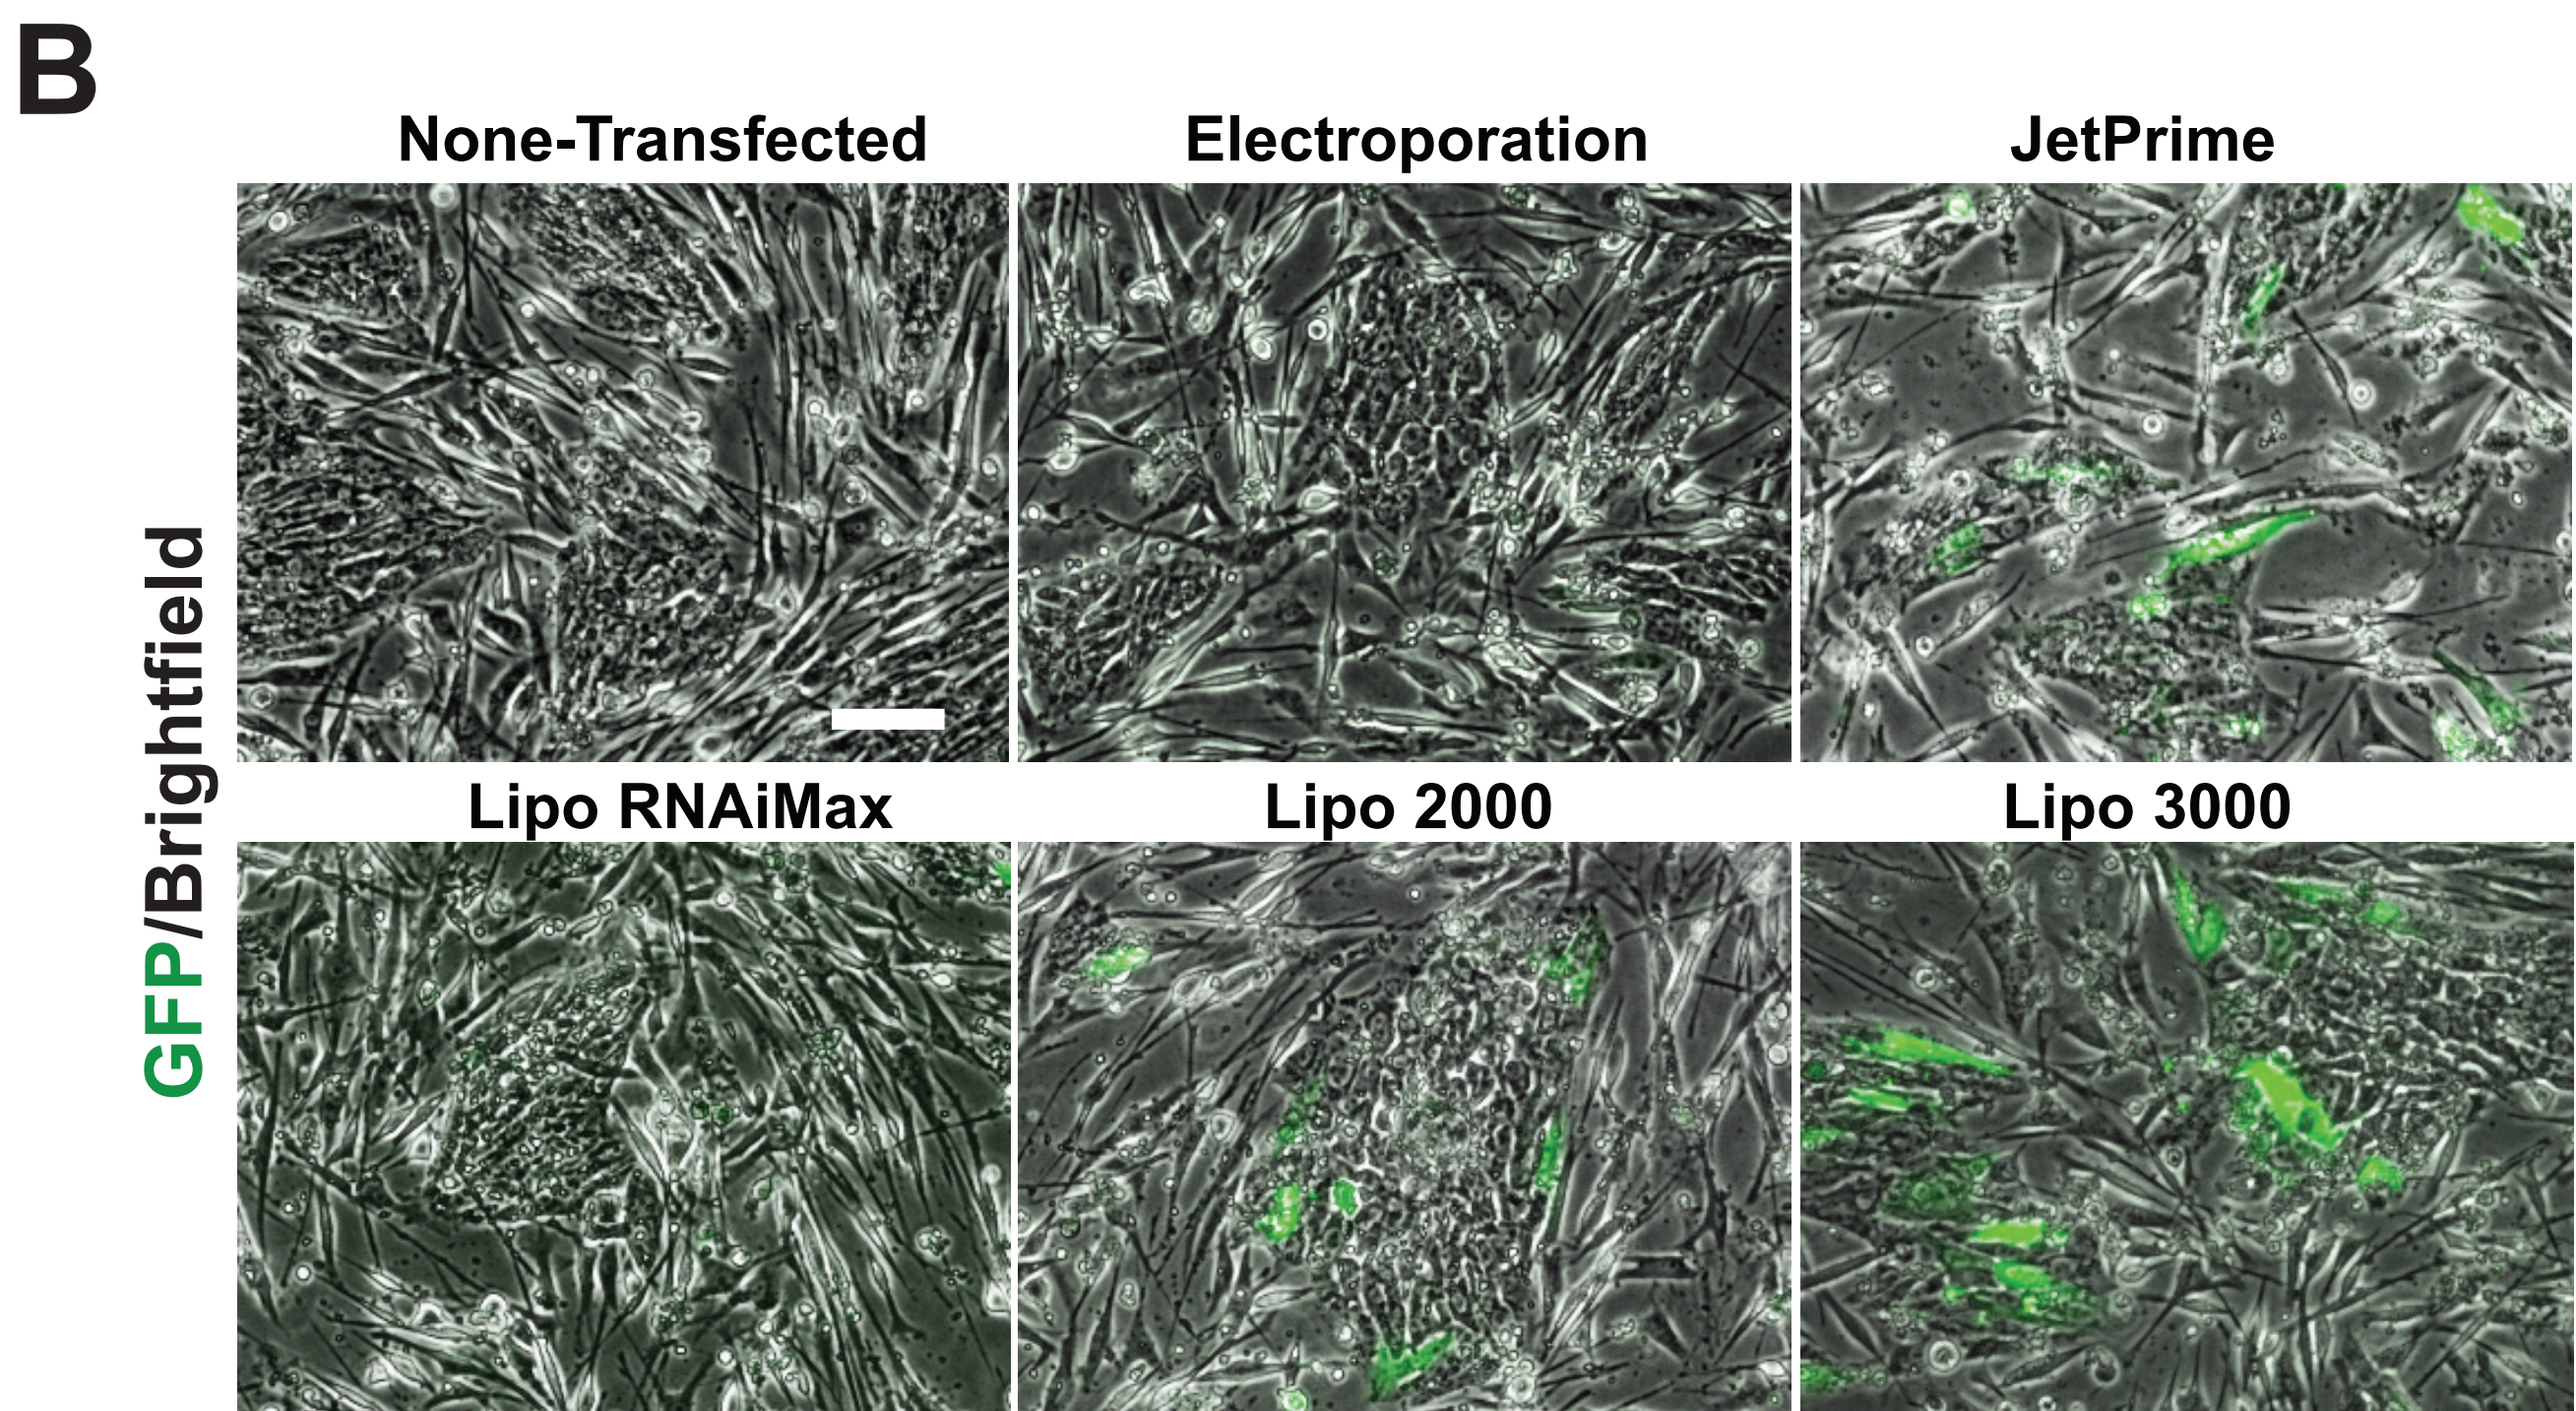



**Figure S4**

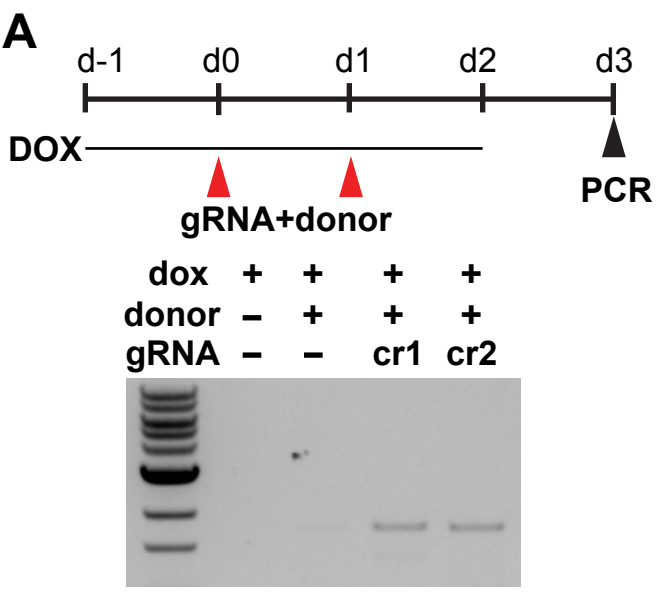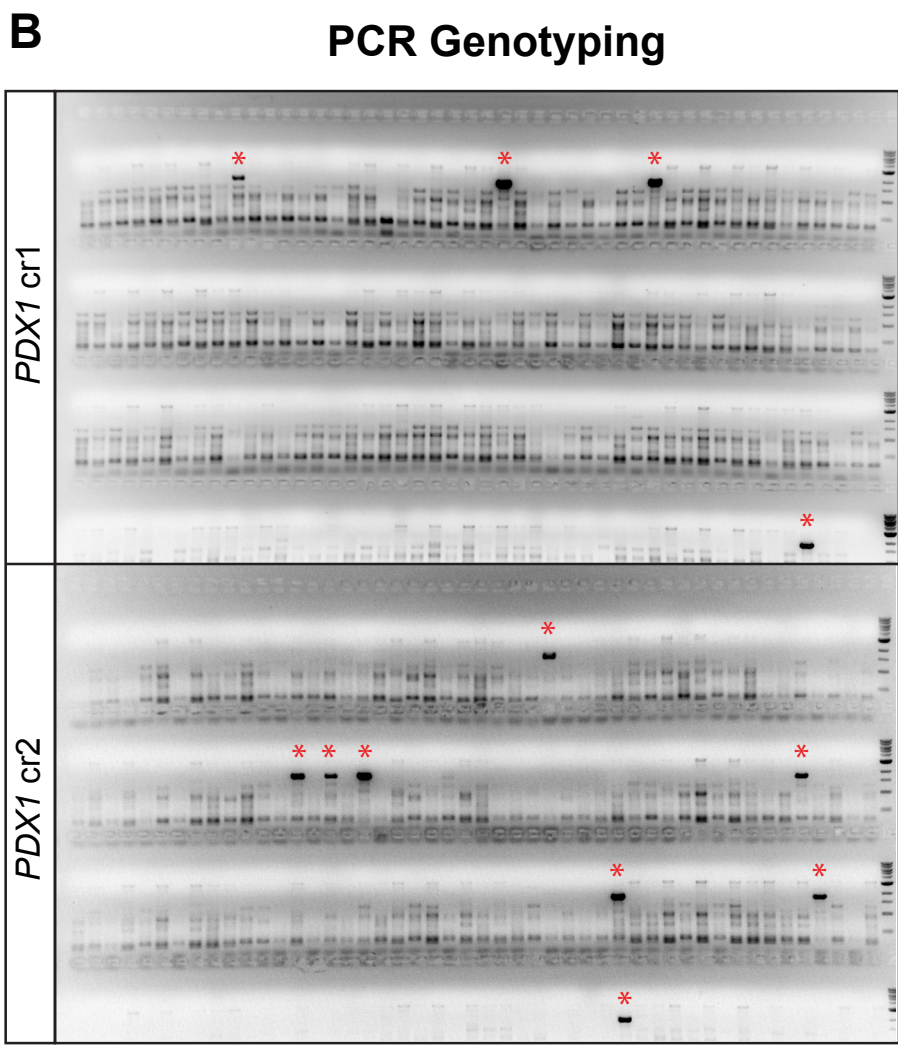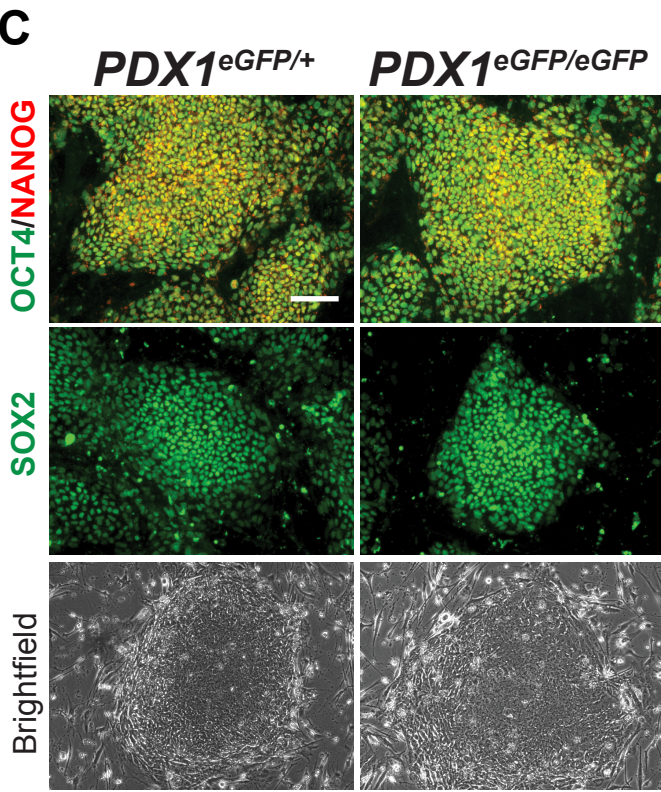

**Figure S1. CRISPR-mediated targeting of the *OCT4* locus through drug selection.**

**(A)** The vector map of the px260 plasmid for expressing Cas9 and crRNA/tracrRNA. **(B)** Four crRNAs were designed to target the stop codon of the *OCT4* locus. Each crRNA was cloned into the px260 vector and transfected into 293T cells. Two days after transfection genomic DNA was collected and Surveyor analysis was used to estimate the efficiency of each CRISPR in generating Indels. Asterisks indicated the cleavage products and the estimated Indel frequencies were labeled in blue. CTRL: px260 vector control; U: undigested control; D: digestion reaction with Surveyor nuclease. **(C)** PCR genotyping results showing 10 positive clones (indicated by red asterisks) identified based on the presence of a correct PCR product (811 bp). **(D)** *OCT4-eGFP* reporter hESCs were stained for pluripotency markers OCT4, NANOG and SOX2, which overlapped with GFP expression. The GFP signal was detected using a GFP antibody. Scale bar = 100  $\mu$ m.

**Figure S2. Targeting the *OCT4* locus without drug selection.**

**(A)** The vector map of the piCRg Entry plasmid for expressing Cas9 and the chimeric gRNA. **(B)** FACS analysis for OCT4-mOrange expressing cells in HUES8 cells after electroporation of the OCT4-mOrange donor and the Cas9/gRNA plasmids. **(C)** FACS analysis for OCT4-mOrange expressing cells in HUES8 iCas9 cells without doxycycline treatment after electroporation of the OCT4-mOrange donor and the Cas9/gRNA plasmids. **(D)** Timeline for establishing hESC reporter lines using iCas9 hESCs. **(E)** FACS analysis for OCT4-mOrange expressing cells in MEL-1 iCas9 cells treated with doxycycline and transfected with the OCT4-mOrange plasmid and *OCT4* cr1 gRNA. **(F)** PCR genotyping for OCT4-mOrange gene targeting. Correctly targeted clones are

indicated in red. **(G)** *OCT4-mOrange* reporter hESCs were stained for pluripotency markers OCT4, NANOG and SOX2, which overlapped with mOrange expression. Scale bar = 100  $\mu$ m.

### **Figure S3. Optimizing co-transfection of DNA and RNA into hESCs.**

**(A)** FACS analysis of hESCs co-transfected with Alexa 555 dsRNA and a GFP-expressing plasmid (~ 10 kb) using four commonly used transfection reagents along with electroporation. Lipofectamine 3000 consistently performed better than the other conditions. Although comparable efficiencies could sometimes be achieved using JetPrime (as shown here), the outcomes were variable and appeared to relate to the amount of DNA used for transfection. **(B)** Stronger GFP expression was detected in hESCs transfected with Lipofectamine 3000, suggesting that increased copy number of GFP-expressing plasmid was transfected into the cell.

### **Figure S4. Generation of *PDX1-eGFP* reporter hESCs without drug selection.**

**(A)** Population level PCR analysis of HUES8 iCas9 cells two days after transfection with gRNA and donor plasmid. **(B)** PCR genotyping of replated clonal hESCs after transfection. Correctly targeted cells are labeled with a red asterisk. **(C)** *PDX1-eGFP* reporter hESC lines displayed proper expression of pluripotency markers OCT4, NANOG and SOX2 and typical hESC morphology. The brightfield images were taken from live cells, and do not correspond to the immunofluorescence images of fixed cells.

**Table S1. Off-target analysis**

**Sequencing analysis of potential off-target sites in *OCT4-eGFP* and *OCT4-mOrange* reporter lines**

| Gene                                 | CRISPR Target Sequence-PAM | Sequencing results in <i>OCT4-eGFP</i> reporter lines |      |    |       |    |        |    |    | Sequencing results in <i>OCT4-mOrange</i> reporter lines |    |    |    |    |    |
|--------------------------------------|----------------------------|-------------------------------------------------------|------|----|-------|----|--------|----|----|----------------------------------------------------------|----|----|----|----|----|
|                                      |                            | 1                                                     | 2    | 4  | 5     | 6  | 7      | 9  | 10 | 3                                                        | 5  | 6  | 7  | 8  | 10 |
| <b><i>OCT4</i> (intended target)</b> | TCTCCCATGCATTCAAAGT-AGG    |                                                       |      |    |       |    |        |    |    |                                                          |    |    |    |    |    |
| <b><i>DLG2</i></b>                   | AAGCTCAGGCATTCAAAGT-TGG    | WT                                                    | WT   | WT | WT    | WT | WT     | WT | WT | WT                                                       | WT | WT | WT | WT | WT |
| <b><i>GPHN</i></b>                   | GCCCTCAGGCATTCAAAGT-TGG    | WT                                                    | WT   | WT | WT    | WT | WT     | WT | WT | WT                                                       | WT | WT | WT | WT | WT |
| <b><i>IMMP2L</i></b>                 | TAGACTTAGCATTCAAAGT-AGG    | WT                                                    | WT   | WT | WT    | WT | WT     | WT | WT | WT                                                       | WT | WT | WT | WT | WT |
| <b><i>PEMT</i></b>                   | GCACCCTAGCATTCAAAGT-TGG    | WT                                                    | WT   | WT | WT    | WT | WT     | WT | WT | WT                                                       | WT | WT | WT | WT | WT |
| <b><i>POLR2J4</i></b>                | AAGGAGAAGCATTCAAAGT-TGG    | WT                                                    | WT   | WT | WT    | WT | WT     | WT | WT | WT                                                       | WT | WT | WT | WT | WT |
| <b><i>POU5F1P4</i></b>               | TCTCCCATGCATTCAAAGT-AGG    | WT                                                    | HET* | WT | HOM** | WT | HOM*** | WT | WT | WT                                                       | WT | WT | WT | WT | WT |
| <b><i>SLC33A1</i></b>                | CAGAAATGGCATTCAAAGT-CGG    | WT                                                    | WT   | WT | WT    | WT | WT     | WT | WT | WT                                                       | WT | WT | WT | WT | WT |

WT: Both alleles are wild-type; HET: One allele has a mutation; HOM: Both alleles have mutations;

\* 6 bp insertion; \*\* 4 bp deletion; \*\*\* 10 bp deletion.

**Sequencing analysis of potential off-target sites in *PDX1-GFP* reporter line # 9 generated using *PDX1* cr1**

| Gene                                 | CRISPR Target Sequence-PAM | Sequencing results in <i>PDX1-GFP</i> reporter line #9 |
|--------------------------------------|----------------------------|--------------------------------------------------------|
| <b><i>PDX1</i> (intended target)</b> | GCCGCAGGAACCACGATGAG-AGG   |                                                        |
| <b><i>SUSD4</i></b>                  | TCCTCAGGACCCACGATGGG-CAG   | WT                                                     |
| <b><i>COX7C</i></b>                  | TCCGTAGGAGCCACTATGAG-GAG   | WT                                                     |
| <b><i>DCPS</i></b>                   | GCCACAGGCACCACGGTGGG-GAG   | WT                                                     |
| <b><i>TRAF3IP2</i></b>               | GCCCCTGGGACCACGAAGAG-AGG   | WT                                                     |
| <b><i>NARF</i></b>                   | GCCGCAGGACCCACGAGAAG-CGG   | WT                                                     |
| <b><i>ILVBL</i></b>                  | GCAGCAGAAACCAGGAGGAG-AGG   | WT                                                     |
| <b><i>BST2</i></b>                   | GCGGCAGGAGCCAGGACGAG-CAG   | WT                                                     |
| <b><i>SNED1</i></b>                  | GCGGCAGGAAACCCGGATGAG-GAG  | WT                                                     |
| <b><i>PSG3</i></b>                   | CCTGCAGGAACCAGGATAAG-AGG   | WT                                                     |
| <b><i>CRAT</i></b>                   | GGGGCAGGAACCAAGCTGAG-TGG   | WT                                                     |



Sequencing analysis of potential off-target sites in *PDX1-GFP* reporter line #4 generated using *PDX1* cr2

| Gene                          | CRISPR Target Sequence-PAM | Sequencing results in<br><i>PDX1-GFP</i> reporter line #4 |
|-------------------------------|----------------------------|-----------------------------------------------------------|
| <i>PDX1</i> (intended target) | GCCTCTCATCGTGGTTCCTG-CGG   |                                                           |
| <i>PSG3</i>                   | TCCTCTTATCCTGGTTCCTG-CAG   | WT                                                        |
| <i>NUBP1</i>                  | GCATCTCCCAGTGGTTCCTG-AGG   | WT                                                        |
| <i>SYNM</i>                   | GTGTCTGACCGTGGTTCCTG-GAG   | WT                                                        |
| <i>HEXDC</i>                  | GCCACTGCACGTGGTTCCTG-AGG   | WT                                                        |
| <i>PSG10P</i>                 | TTCTCTTATCCTGGTTCCTG-CAG   | WT                                                        |
| <i>KCNQ1</i>                  | TGCTCTCACCTTGGTTCCTG-GGG   | WT                                                        |
| <i>FBRSL1</i>                 | GCCAGGCATCGGGTTCCTG-CAG    | WT                                                        |
| <i>FOXJ3</i>                  | ACCTGCCATCGTTGTTTCCTG-GAG  | WT                                                        |
| <i>OR6M1</i>                  | ATCTCTCTTCGTGGTTCCTG-TGG   | WT                                                        |
| <i>MAGEA8</i>                 | ACCTCACAGCCTGGTTCCTG-GAG   | WT                                                        |

**Table S2. Oligonucleotides used in this study**

**Oligonucleotides for generating Cas9/crRNA/tracrRNA or Cas9/gRNA expressing plasmids**

| Gene        | CRISPR target sequence (5' of PAM) | Vector                         | Oligos used for generating the CRISPR constructs (5' to 3')                                        |
|-------------|------------------------------------|--------------------------------|----------------------------------------------------------------------------------------------------|
| <b>OCT4</b> | <b>cr1-dp</b>                      | CACTCTGGGCTCTCCCATGCATTCAAAGT  | <b>px260</b><br>F: AAACCACTCTGGGCTCTCCCATGCATTCAAAGTGGT<br>R: TAAAACCAGTTTGAATGCATGGGAGAGCCCAGAGTG |
|             | <b>cr2-dp</b>                      | TGCATTCAAAGTGGGTCCTGCCCTTCTA   | <b>px260</b><br>F: AAAGTGCATTCAAAGTGGGTCCTGCCCTTCTAGT<br>R: TAAAAGTAGAAGGGCAGGCACCTCAGTTTGAATGCA   |
|             | <b>cr3-dp</b>                      | ATGCATTCAAAGTGGGTCCTGCCCTTCT   | <b>px260</b><br>F: AAAGTGCATTCAAAGTGGGTCCTGCCCTTCTGT<br>R: TAAAACAGAAGGGCAGGCACCTCAGTTTGAATGCAT    |
|             | <b>cr4-dp</b>                      | CTCTGGGCTCTCCCATGCATTCAAAGTGAG | <b>px260</b><br>F: AAAGCTCTGGGCTCTCCCATGCATTCAAAGTGGT<br>R: TAAAAGCTCAGTTTGAATGCATGGGAGAGCCCAGAG   |
|             | <b>cr1</b>                         | TCTCCCATGCATTCAAAGT            | <b>piCRg Entry</b><br>F: CACCGCTCCCATGCATTCAAAGT<br>R: AAACCACTCTGGGCTCTCCCATGCATTCAAAGT           |
| <b>PDX1</b> | <b>cr1</b>                         | GCCGCAGGAACCACGATGAG           | <b>piCRg Entry</b><br>F: CACCGCCGCAGGAACCACGATGAG<br>R: AAAGCTCATCGTGGTTCCTGCGGC                   |
|             | <b>cr2</b>                         | GCCTTCATCGTGGTTCCTG            | <b>piCRg Entry</b><br>F: CACCGCTTCATCGTGGTTCCTG<br>R: AAACCACTTCATCGTGGTTCCTG                      |

**PCR Primers for generating templates for gRNA *in vitro* transcription**

| Gene                            | CRISPR target sequence (5' of PAM) | CRISPR specific forward primer (5' to 3')         |
|---------------------------------|------------------------------------|---------------------------------------------------|
| <b>OCT4</b>                     | <b>cr1</b> TCTCCCATGCATTCAAAGT     | <b>F:</b> TAATACGACTCACTATAGGGCTCCCATGCATTCAAAGT  |
| <b>PDX1</b>                     | <b>cr1</b> GCCGCAGGAACCACGATGAG    | <b>F:</b> TAATACGACTCACTATAGGGCCGCAGGAACCACGATGAG |
|                                 | <b>cr2</b> GCCTTCATCGTGGTTCCTG     | <b>F:</b> TAATACGACTCACTATAGGGCCTTCATCGTGGTTCCTG  |
| <b>Universal reverse primer</b> |                                    | <b>gRNA-R:</b> AAAAGCACCGACTCGGTGCC               |



## PCR Primers for donor plasmid construction

| Donor plasmid    |                 | Primer sequence (5' to 3')                                                                           |
|------------------|-----------------|------------------------------------------------------------------------------------------------------|
| <b>OCT4</b>      | <b>Nh2AOr-F</b> | TTCTAGCTAGCACCGGTGCCACGAACCTTCTCTCTGTTAAAGCAAGCAGGAGACGTGGAAGAAAACCCCGG<br>TCCTATGGTGAGCAAGGGCGAGGAG |
|                  | <b>AscOr-R</b>  | CTTATGGCGCGCCTTACTTGTACAGCTCGTCCAT                                                                   |
| <b>PDX1-eGFP</b> | <b>HL-F</b>     | GTCAGTGAATTCAGGACCACTCATTGGCAGAG                                                                     |
|                  | <b>HL-R</b>     | GTCAGTCTGCAGGCTAGCTCGTGGTTCCCTGCGGCCGCC                                                              |
|                  | <b>HR-F</b>     | GTCAGTCTGCAGGGCGCGCCGAGGCAGGAGCTGCTCCTGG                                                             |
|                  | <b>HR-R</b>     | GTCAGTGGATCCACTCACTGTATTCCACTGGC                                                                     |
|                  | <b>2A-GFP-F</b> | CAGTGCTAGCGCCACTAACTTCTCCCTGTT                                                                       |
|                  | <b>2A-GFP-R</b> | TCAGTCGGCGCGCCTTACTTGTACAGCTCGTCCA                                                                   |

## PCR primers for genotyping

| Gene        |               | Primer sequence (5' to 3') |
|-------------|---------------|----------------------------|
| <b>OCT4</b> | <b>F:</b>     | AGTCCAAAGCTTGCCCTTGTCACC   |
|             | <b>GFP-R:</b> | AGCTCCTCGCCCTTGCTCACC      |
|             | <b>mOr-R:</b> | GAGGTGATGTCCAACCTTGATGCCGA |
| <b>PDX1</b> | <b>F:</b>     | ATTTGCTGGCTCTCAGGTTG       |
|             | <b>R:</b>     | GTTACCTTGATGCCGTTCT        |

## PCR primers for generating Southern blot probes

| Gene        | Probe                   | Primer sequence (5' to 3')        |
|-------------|-------------------------|-----------------------------------|
| <b>OCT4</b> | <b>External</b>         | <b>F:</b> CCAGTGGGAGTCAGTGGGGCT   |
|             |                         | <b>R:</b> GTCCGACTCCCAAGAGGTCACAG |
|             | <b>Internal Puro</b>    | <b>F:</b> TGACCGAGTACAAGCCCACGG   |
|             |                         | <b>R:</b> TCGTAGAAGGGGAGGTTGC     |
|             | <b>Internal mOrange</b> | <b>F:</b> TGGCCATCATCAAGGAGTTCA   |
|             |                         | <b>R:</b> CTTCTTCTGCATTACGGGGCCG  |
| <b>PDX1</b> | <b>External</b>         | <b>F:</b> AACACCTCTGAGGGCATTG     |
|             |                         | <b>R:</b> CGGACACTGCAGGTCAGTTA    |
|             | <b>Internal GFP</b>     | <b>F:</b> GTTCATCTGCACCACCGG      |
|             |                         | <b>R:</b> CGCGCTTCTCGTTGGGGT      |

# Supplemental Experimental Procedures

## Generation of constructs

To generate CRISPR plasmids expressing Cas9 and the crRNA/tracrRNA duplex targeting specific genomic loci, 30-bp protospacer sequences were cloned into the px260 (Addgene: 42229) as previously described (Cong et al., 2013). Briefly, vectors were digested with BbsI, treated with Antarctic Phosphatase, and gel purified. A pair of oligonucleotides containing the 30-bp protospacer sequence was annealed generating BbsI overhangs, and cloned into BbsI-digested, dephosphorylated vectors. The same procedure was also used to generate CRISPR plasmids expressing Cas9 and the chimeric gRNA with the difference that a pair of oligonucleotides containing the 20-bp protospacer sequence was cloned into the piCRg Entry plasmid (Addgene: 58904). The sequences for all oligonucleotides used for generating the CRISPR constructs are listed in Table S2.

For generation of *OCT4-eGFP* hESC reporter lines, the OCT4-2A-eGFP-PGK-Puro plasmid (Addgene: 31938) was used. The left homology arm is 697 bp and the right homology arm is 699 bp. The *OCT4-mOrange* hESC reporter lines were made using the OCT4-2A-mOrange targeting vector. To generate the OCT4-2A-mOrange targeting vector, an NheI-2AmOrange-Ascl cassette was PCR amplified using the mOrange-pBAD plasmid template (Addgene: 54751) and primers Nh2AOr-F and AscOr-R. Next, the NheI-2A-mOrange-Ascl PCR fragment and the OCT4-2A-eGFP-PGK-Puro plasmid were digested with NheI and Ascl and ligated.

For constructing the PDX1-GFP donor plasmid, the 725-bp left (Primers: HL-F and HL-R) and 543-bp right (Primers: HR-F and HR-R) homology arms were PCR



amplified from the HUES8 genomic DNA and cloned into the pBlueScript SKII (+) plasmid to generate the pBS-PDX1 plasmid. The 2A-eGFP insert was PCR amplified from the OCT4-2A-eGFP-PGK-Puro plasmid (Addgene: 31938) using 2A-eGFP-F and 2A-eGFP-R primers, digested and cloned into the pBS-PDX1 plasmid to generate the PDX1-eGFP donor plasmid. In the donor plasmid, the 2A-eGFP sequences was fused in-frame to the last codon of *PDX1*. The sequences for all primers used for generating the donor plasmids are listed in Table S2.

## Cell Culture

HUES8 (NIHhESC-09-0021) and MEL-1 (NIHhESC-11-0139) hESCs were cultured on irradiated mouse embryonic fibroblasts (iMEFs) feeder layers in DMEM/F12 medium (Life Technologies) supplemented with 20% KnockOut Serum Replacement (Life Technologies), 1X MEM Non-Essential Amino Acids (Life Technologies), 1X GlutaMAX (Life Technologies), 100U/ml Penicillin and 100 µg/ml Streptomycin (Gemini), 0.055 mM 2-mercaptoethanol (Life Technologies) and 10 ng/ml recombinant human basic FGF (EMD Millipore). Cells were incubated at 37 °C with 5% (vol/vol) CO<sub>2</sub>, and media was changed daily. Cultures were passaged at a 1:6 - 1:12 split ratio every 4 - 6 days using 0.05% trypsin/EDTA. 5 µM Rho-associated protein kinase (ROCK) inhibitor Y-27632 (Selleck Chemicals) was added into the culture medium when passaging or thawing cells.

293T cells were maintained in DMEM supplemented with 15% fetal bovine serum, 1X GlutaMAX, 1X MEM NEAA and 1mM Sodium Pyruvate (Life Technologies).

## Differentiation of hESCs

For differentiation of *OCT4* reporter lines, undifferentiated hESCs cultured on iMEF feeder layer were first adapted to the feeder-free E8 culture. Briefly, hESCs were passaged using 0.05% trypsin/EDTA and plated at a 1:3 split ratio on Matrigel (BD Biosciences) coated plates in E8 medium (Stem Cell Technologies). Cells were incubated at 37 °C with 5% (vol/vol) CO<sub>2</sub>, and media was changed daily. After 2 passages in E8 medium, the cells were differentiated: 2 days after passaging, cells were treated with 10 μM SB431542 (Sigma Aldrich) and 10 ng/mL BMP4 (R&D Systems) to initiate differentiation. After 3 days of this treatment, eGFP and mOrange fluorescence was analyzed by flow cytometry and fluorescence microscopy.

For differentiation into pancreatic lineages, undifferentiated hESC were cultured until 50-70% confluency, washed with PBS w/Ca<sup>2+</sup>Mg<sup>2+</sup> once and treated with 2 μM BIO-acetoxime (Tocris), 100 ng/ml Activin A (R&D) in advanced RPMI (Invitrogen) for 1 day. The medium was changed to 100 ng/ml Activin A in advanced RPMI with 0.2% FBS for 2 days. On day 3, cells were treated with 50 ng/ml FGF10 (R&D) and 0.25 μM SANT1 (Sigma) in advanced RPMI with 2% FBS for 2 days. On day 5, cells were treated with 50 ng/ml FGF10, 0.25 μM SANT1, 2 μM Retinoic Acid (Sigma) and 250 nM LDN (Stemgent) in DMEM with 1% B27 (Invitrogen) for 4 days. Then on day 9, cells were treated with 1 μM Alk5 inhibitor (Axxora), 100 ng/mL Noggin (R&D system) and 1 μM DAPT (Tocris) in DMEM with 1% B27 for 4 days. After that, cells were kept in DMEM with 1% B27 for another 4 days and were examined for the expression of pancreatic cell specific markers.



## ***In vitro* transcription of gRNAs**

A T7 promoter was added to gRNA templates by PCR amplification on piCRg Entry vectors using CRISPR-specific forward primers and a universal reverse primer gRNA-R (Table S2). T7-gRNA PCR products were used as templates for *in vitro* transcription using the MEGAscript T7 kit (Life Technologies). The resulting gRNAs were purified using the MEGAclear kit (Life Technologies), eluted in RNase-free water and stored at -80°C until use.

## **Electroporation**

HUES8 hESCs were pre-treated with Rho-associated protein kinase (ROCK) inhibitor Y-27632 (Selleck Chemicals) 24 hours before electroporation. On the day of electroporation, hESCs were disassociated into single cells with 0.25% Trypsin/EDTA and filtered through a 40 µM cell strainer to remove cell clumps. 10 million cells were re-suspended in 800 µL cold PBS and mixed with targeting and donor plasmids (10 µg CRISPR targeting plasmid and 40 µg donor plasmid). Cells were electroporated using the Gene Pulser XCell (Bio-Rad) at 250 V, 500 µF in a 0.4 cm Gene Pulser cuvette (Bio-Rad). Cells were recovered and re-plated on irradiated mouse embryonic fibroblast (iMEF) coated plates with ROCK inhibitor.

For the generation of *OCT4-eGFP* lines, two days after electroporation cells were treated with puromycin (0.5 µg/mL) for three days. Two weeks after electroporation individual colonies were picked and expanded for PCR genotyping, Southern blot analysis and sequencing for the establishment of reporter lines. Three of the correctly targeted clones (#1, #4 and #7) were electroporated with Cre recombinase following the same procedure described above. After electroporation with 50 µg of Cre recombinase

plasmid, the cells were recovered and replated on iMEF with ROCK inhibitor. 3 days after electroporation, GFP-expressing (GFP<sup>+</sup>) cells were observed. GFP<sup>+</sup> cells were isolated by FACS and plated at a low density (2,000 cell/10cm dish) for subsequent picking and expansion of individual clones.

## **Transfection**

HUES8 and MEL-1 iCas9 hESCs (Gonzalez et al., 2014) were treated with ROCK inhibitor and doxycycline one day before transfection. For transfection, cells were dissociated using TrypLE (Life Technologies), replated at 200,000 hESCs per well in iMEF-coated 12-well plates and transfected in suspension with gRNAs and donor plasmid. A second transfection was performed 24 hours later. Transfection of the gRNAs and donor plasmid into hESCs was performed using Lipofectamine 3000 (Life Technologies) following manufacturer's guidelines. For each targeting, gRNAs at a 10 nM final concentration and 5 µg of donor plasmid were used. Lipofectamine 3000 and gRNA + donor plasmid were diluted separately in Opti-MEM (Life Technologies), mixed together, incubated for 5 min, and added drop-wise to cultured hESCs.

## **Assessment of Indel mutations using the Surveyor Nuclease Assay**

80-90% confluent 293T cells in 6-well dishes were transfected using JetPrime transfection reagent (Polyplus) following manufacturer's guidelines. For each well, a total of 2 µg CRISPR plasmid was transfected. After transfection the cells were incubated at 37 °C for 2 days prior to genomic DNA extraction. The Surveyor Kit (Transgenomic) was used to test the efficiency of each crRNA for producing Indels. Genomic DNA was extracted using the DNeasy Blood & Tissue Kit (Qiagen) following the manufacturer's protocol. The genomic region flanking the CRISPR target site for each gene was PCR



amplified. For Surveyor analysis 16  $\mu\text{L}$  of PCR product (at 25 ng/ $\mu\text{L}$ ) was denatured and re-annealed in JumpStart buffer to a total volume of 20  $\mu\text{L}$  using the following protocol: 95  $^{\circ}\text{C}$ , 5 min; 95–85  $^{\circ}\text{C}$  at  $-2^{\circ}\text{C/s}$ ; 85–25  $^{\circ}\text{C}$  at  $-0.1^{\circ}\text{C/s}$ ; hold at 4  $^{\circ}\text{C}$ . 10  $\mu\text{L}$  of hybridized PCR products was treated with 1  $\mu\text{L}$  of Surveyor Enhancer S and 1  $\mu\text{L}$  of Surveyor Nuclease S at 42 $^{\circ}\text{C}$  for 60 minutes. The reaction was stopped by adding 1.2  $\mu\text{L}$  of Stop solution to each tube. Products were then analyzed on 2.5% agarose gel and imaged with a Gel Doc gel imaging system (Bio-Rad). Quantification was based on relative band intensities using ImageJ. Indel mutation percentage was determined by the formula:  $100 \times (1 - (1 - (b + c) / (a + b + c))^{1/2})$ , where  $a$  is the integrated intensity of the undigested PCR product, and  $b$  and  $c$  are the integrated intensities of each cleavage product.

### **Southern Blot Analysis**

The external and internal probes were generated by PCR using the PCR DIG Probe Synthesis Kit (Roche). For the external probes we used HUES8 genomic DNA as the template. For internal probe generation we used the OCT4 2A-eGFP-PGK-Puro donor, OCT4-2A-mOrange donor and PDX1-2A-eGFP donor templates. For membrane hybridization, 5  $\mu\text{L}$  of denatured DIG-labeled PCR product was added to 20 mL of hybridization buffer.

To identify correctly targeted hESC lines, genomic DNA was extracted using the DNeasy Blood & Tissue Kit (Qiagen). 5-10  $\mu\text{g}$  of genomic DNAs was digested overnight with the appropriate restriction enzymes (OCT4 external and mOrange internal: BamHI, puromycin internal: EcoRI, PDX1 external: ApaLI, eGFP internal: ApaLI ) and then migrated in 1% agarose gels. The gel was denatured, neutralized, and transferred

overnight by capillarity on Hybond-N membranes (GE Healthcare) using 10x SSC transfer buffer. Hybridization with the external or the internal probe was carried out overnight at 65 °C. Probes were detected using an AP-conjugated DIG-Antibody (Roche) using CDP-Star (Roche) as a substrate for chemiluminescence as per manufacturer's instructions.

### **Immunofluorescence staining**

For immunostaining, cells were fixed with 4% paraformaldehyde for 10 minutes, washed once with phosphate buffered saline (PBS) and permeabilized in PBST (PBS + 0.1% Triton) for 15 minutes. Blocking was done for 5 minutes at RT with blocking solution (5% donkey serum in PBST). Primary and secondary antibodies were diluted in blocking solution. Primary antibodies were incubated at RT for 1 hr. The following primary antibodies were used at a 1:100 dilution: OCT4 (mouse monoclonal, Santa Cruz sc-5279); NANOG (rabbit polyclonal, CosmobioJapan REC-RCAB0004P-F); SOX2 (goat polyclonal, Santa Cruz sc-17320), RFP (rabbit polyclonal, Life Technologies R10367), GFP (rabbit polyclonal, Life Technologies A-6455). The PDX1 antibody was used at a 1:500 dilution (goat polyclonal, R&D AF2419). After primary antibody staining the cells were washed three times with PBST and then incubated with the appropriate Molecular Probes Alexa Fluor dye conjugated secondary antibodies (Life Technologies) for 1 hr.

### **Reference:**

Cong, L., Ran, F.A., Cox, D., Lin, S., Barretto, R., Habib, N., Hsu, P.D., Wu, X., Jiang, W., Marraffini, L.A., *et al.* (2013). Multiplex genome engineering using CRISPR/Cas systems. *Science* 339, 819-823.
